# Supplementary material for: CXC-Type Chemokines Promote Myofibroblast Phenoconversion and Prostatic Fibrosis
Source: PLOS journal article supplement (doi:10.1371/journal.pone.0049278), 2012-11-16

0516 Primary Prostate Stromal Fibroblasts

CXCL12 TREATMENT: 0pM, 10pM, or 100pM  
as indicated

x axis: treatment time (hr)  
y axis: 2ddCt (T-UT)

TGF- $\beta$ 1 Transcript

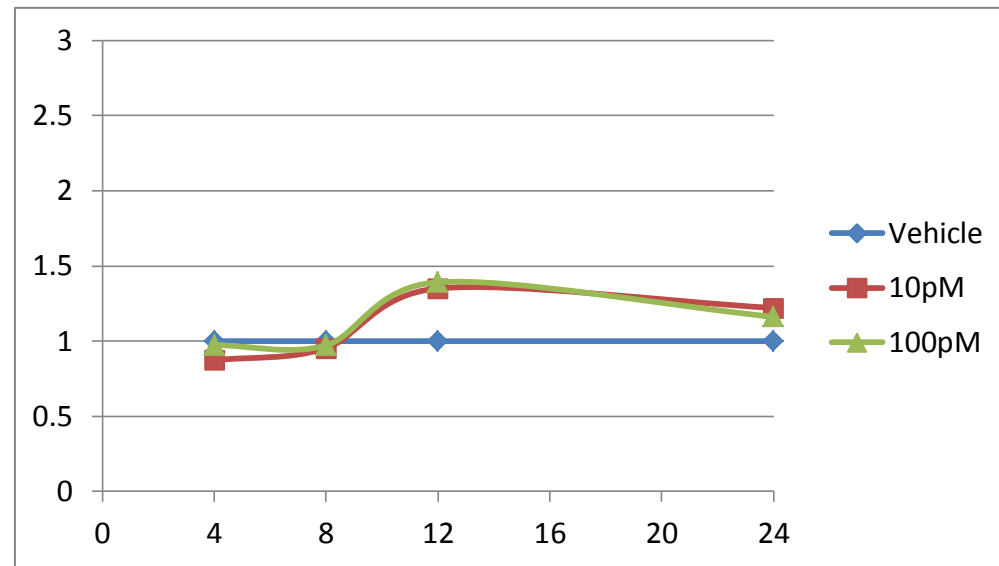

CXCL8 TREATMENT: 0pM, 10pM, or 100pM  
as indicated

x axis: treatment time (hr)  
y axis: 2ddCt (T-UT)

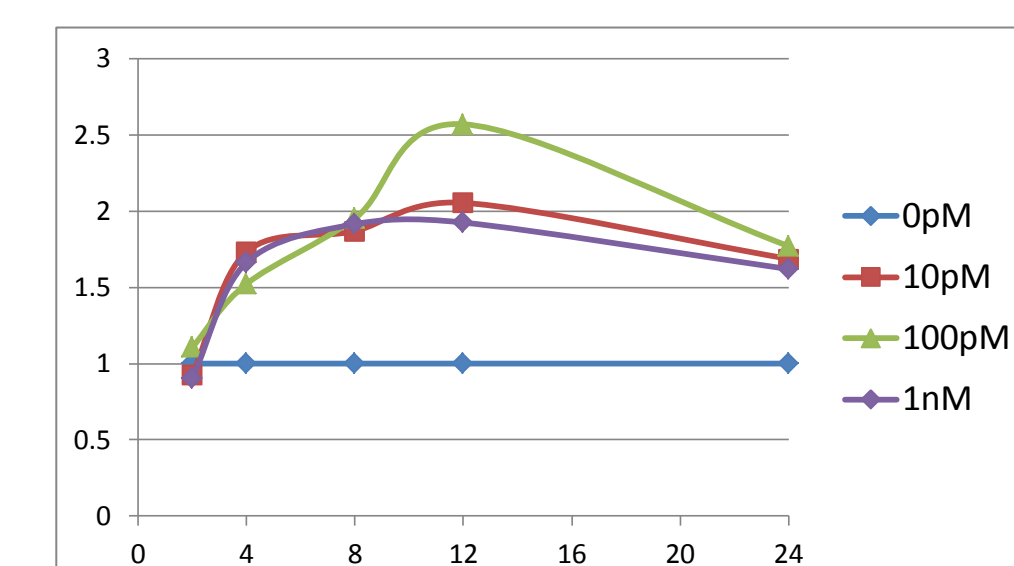

CXCL5 TREATMENT: 0pM, 10pM, or 100pM  
as indicated

x axis: treatment time (hr)  
y axis: 2ddCt (T-UT)

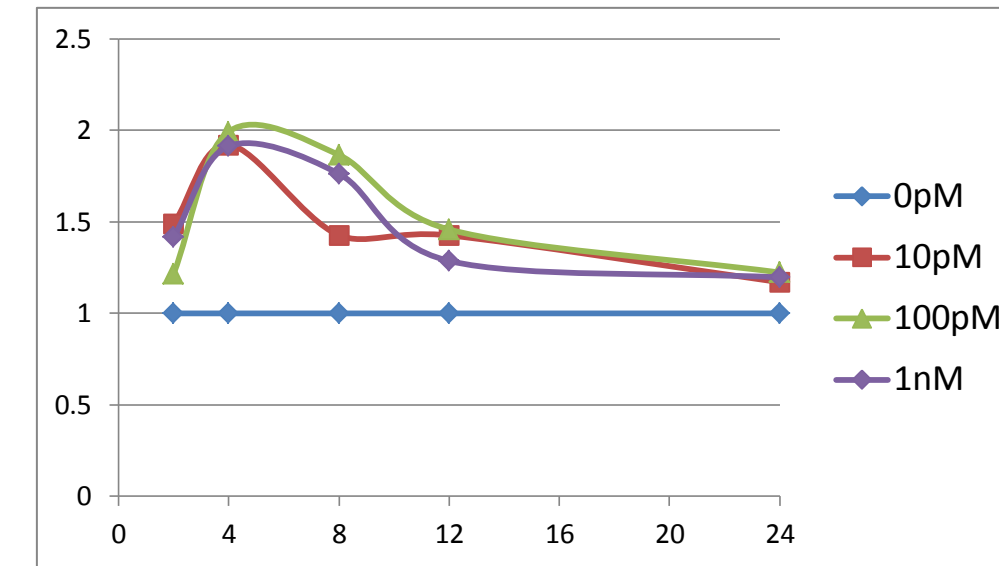

TGF- $\beta$ 1 TREATMENT: 0, 2, or 4 ng/ml as  
indicated

x axis: treatment time (hr)  
y axis: 2ddCt (T-UT)

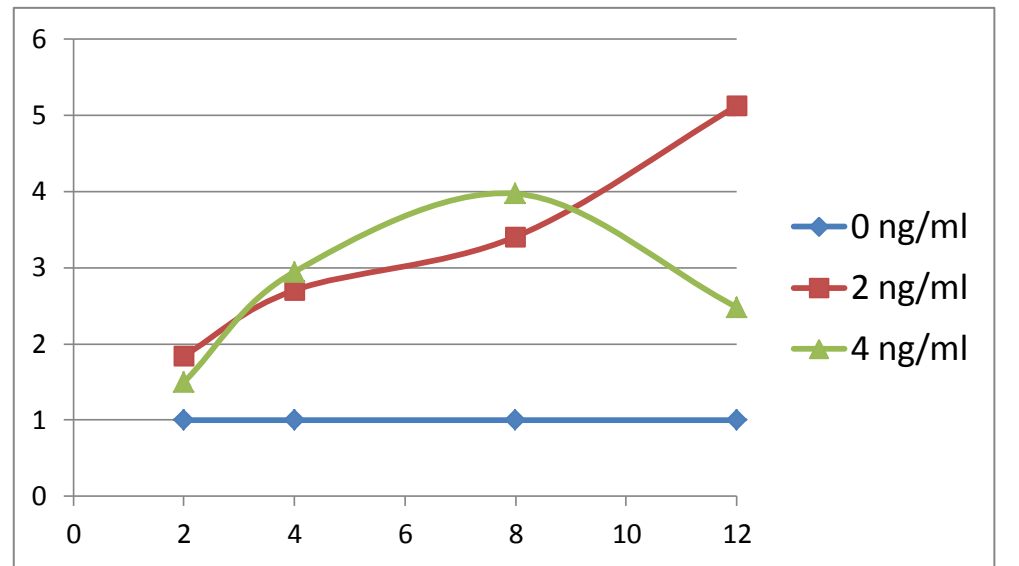

COL1 Transcript

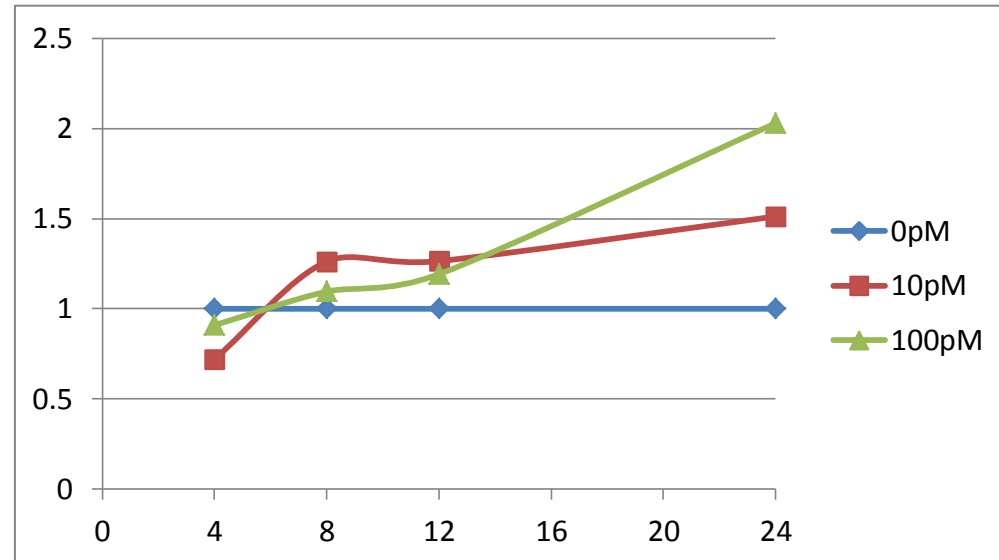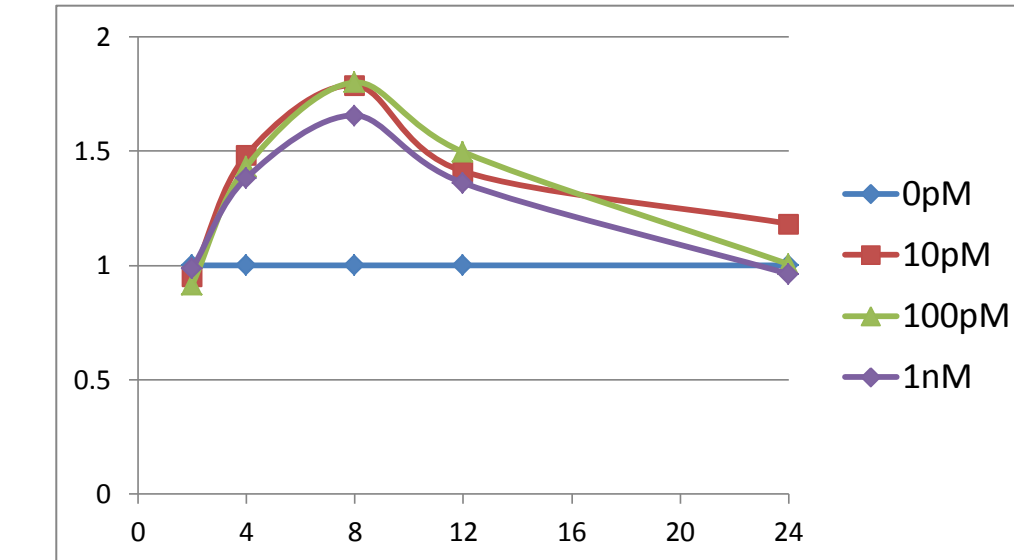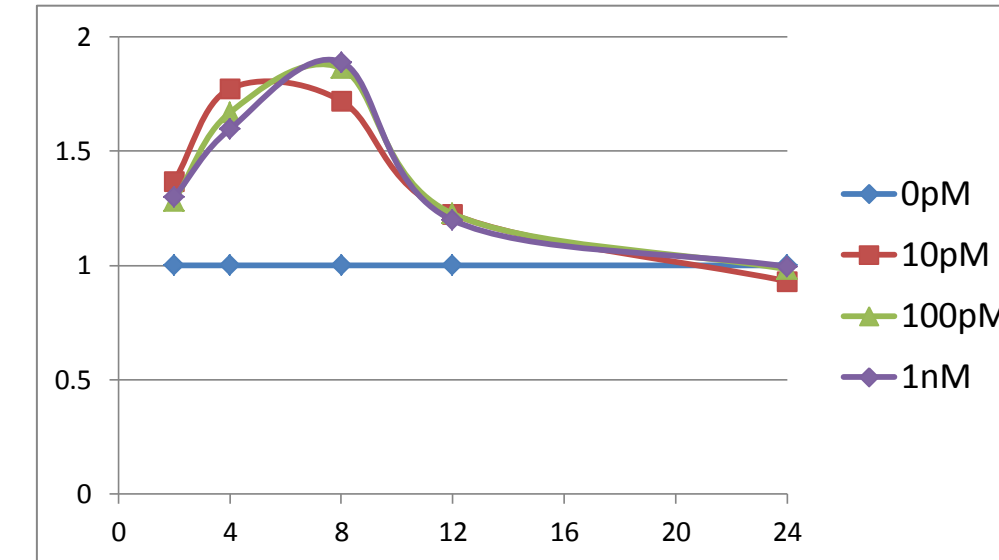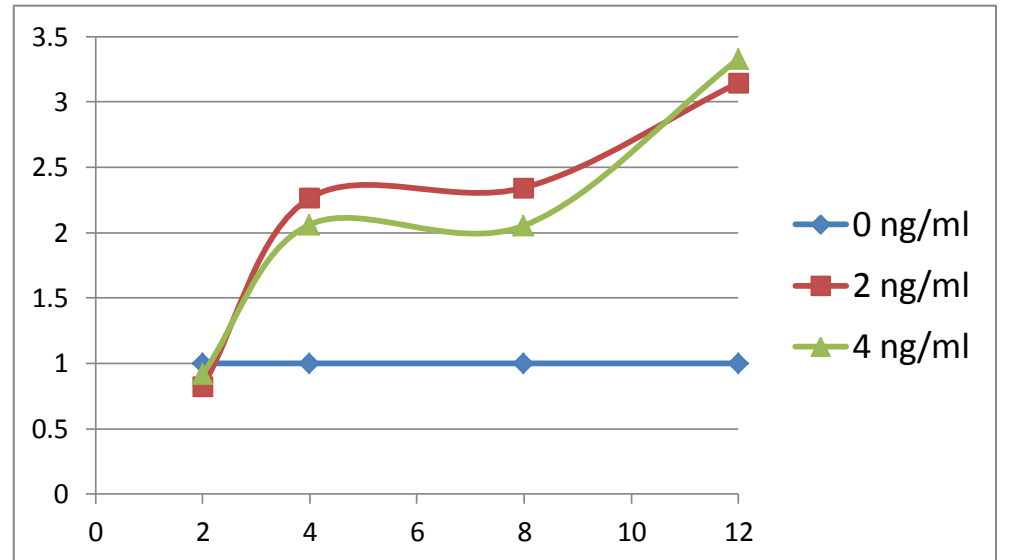

$\alpha$ SMA Transcript

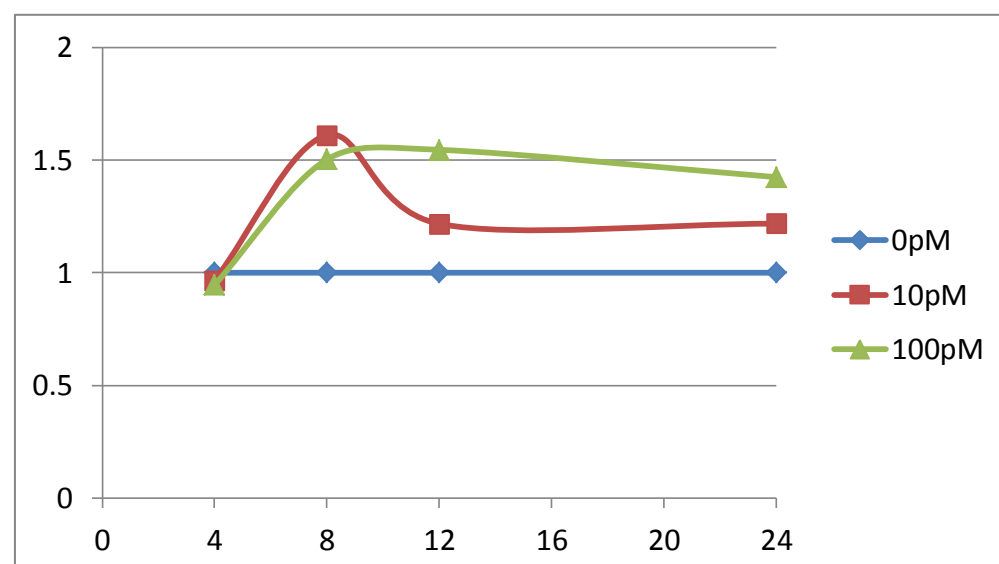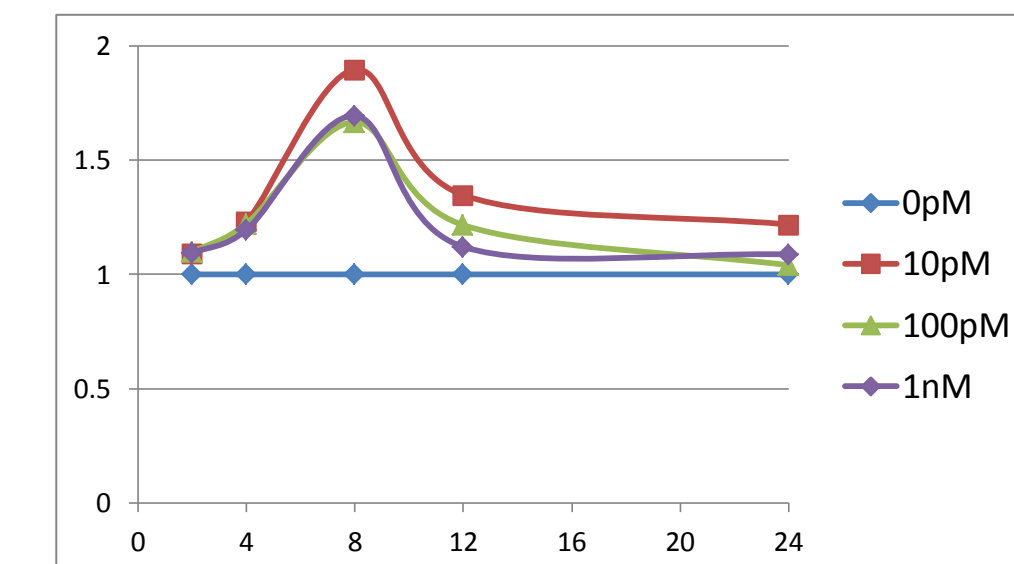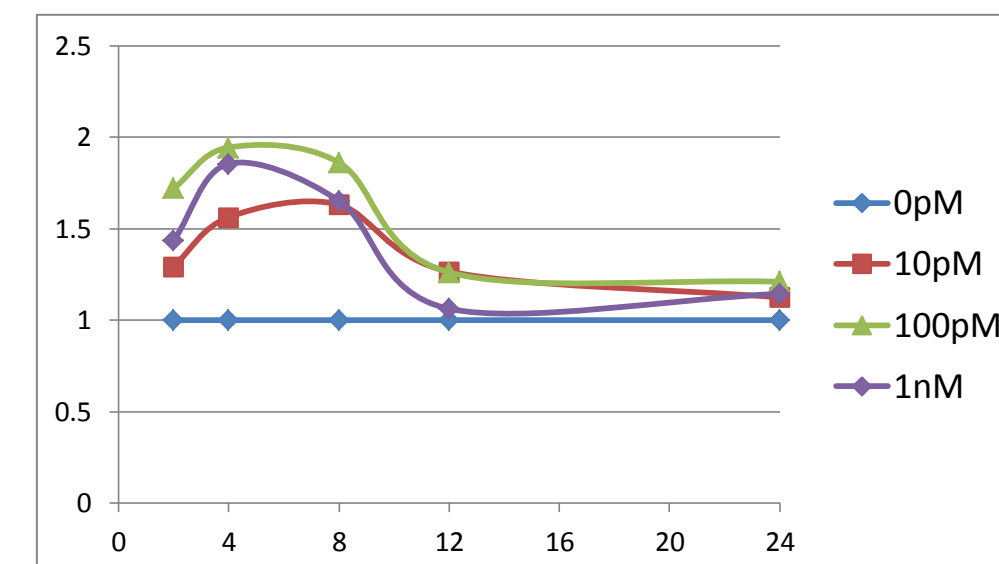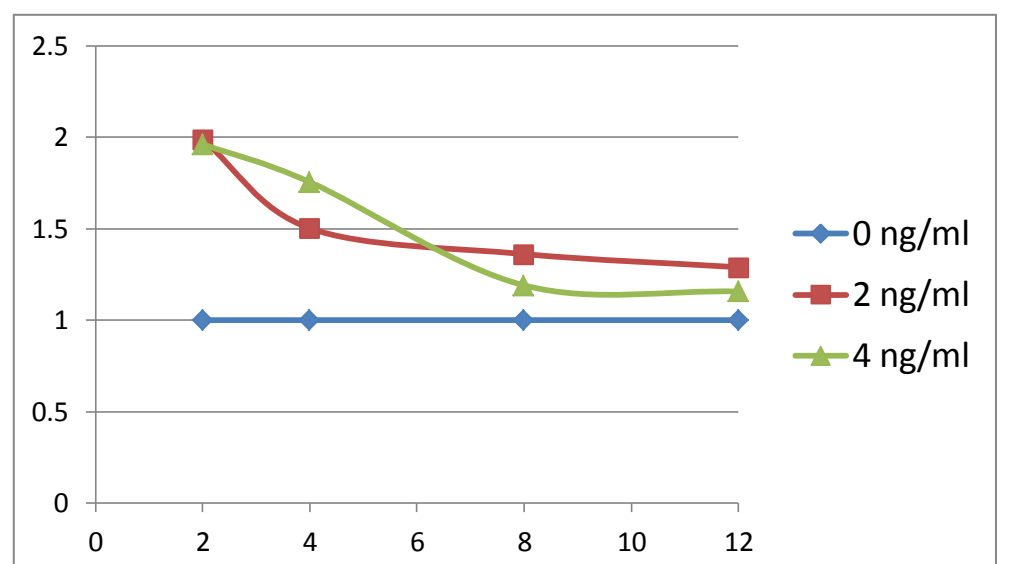

COL3 Transcript

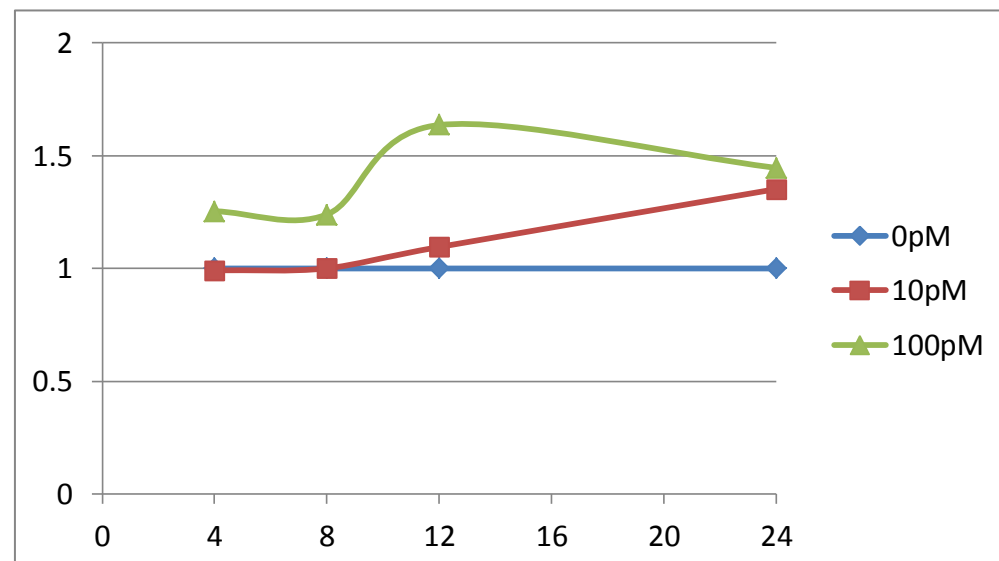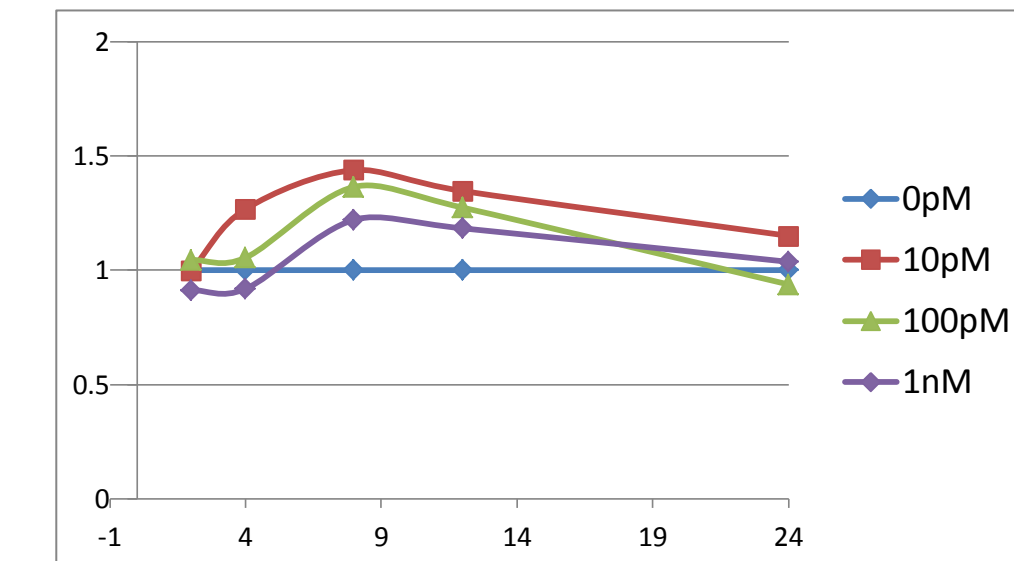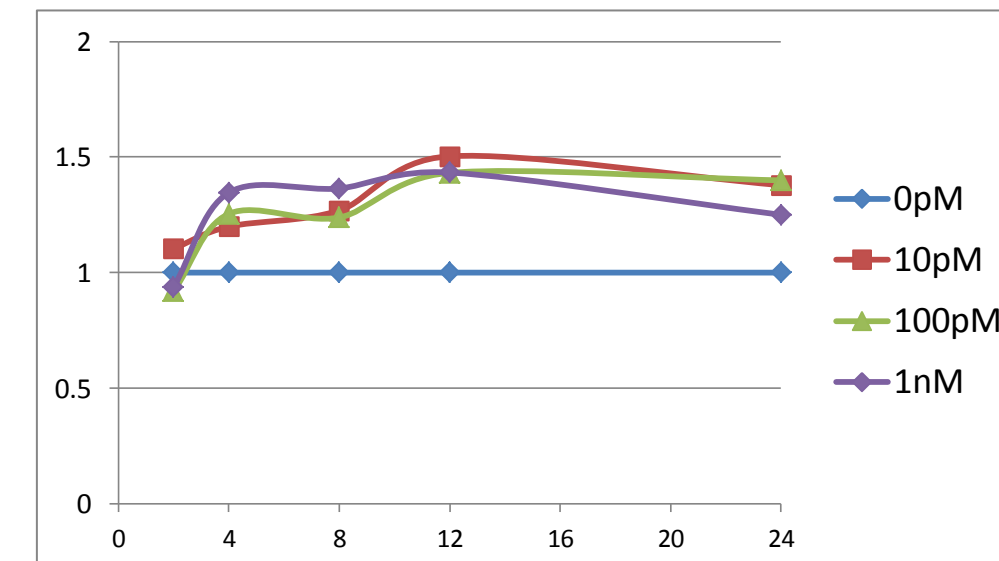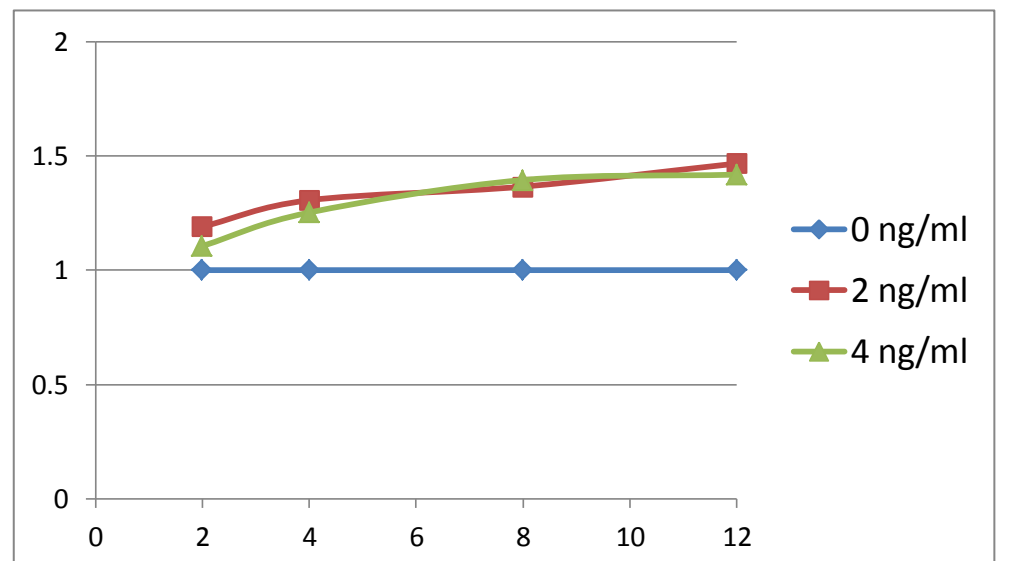

0906 Primary Prostate Stromal Fibroblasts

CXCL12 TREATMENT: 0pM, 10pM, or 100pM  
as indicated

x axis: treatment time (hr)  
y axis: 2ddCt (T-UT)

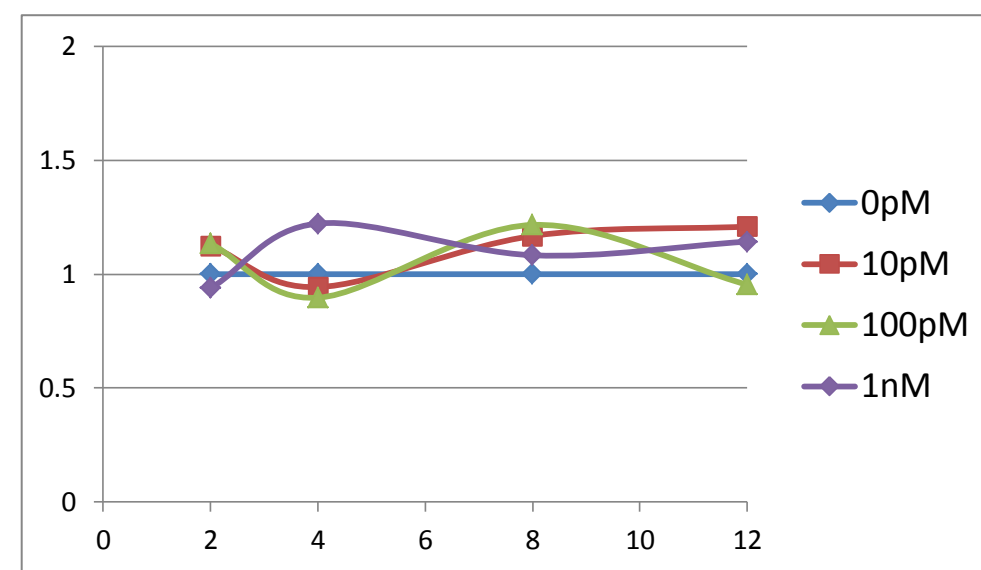

CXCL8 TREATMENT: 0pM, 10pM, or 100pM  
as indicated

x axis: treatment time (hr)  
y axis: 2ddCt (T-UT)

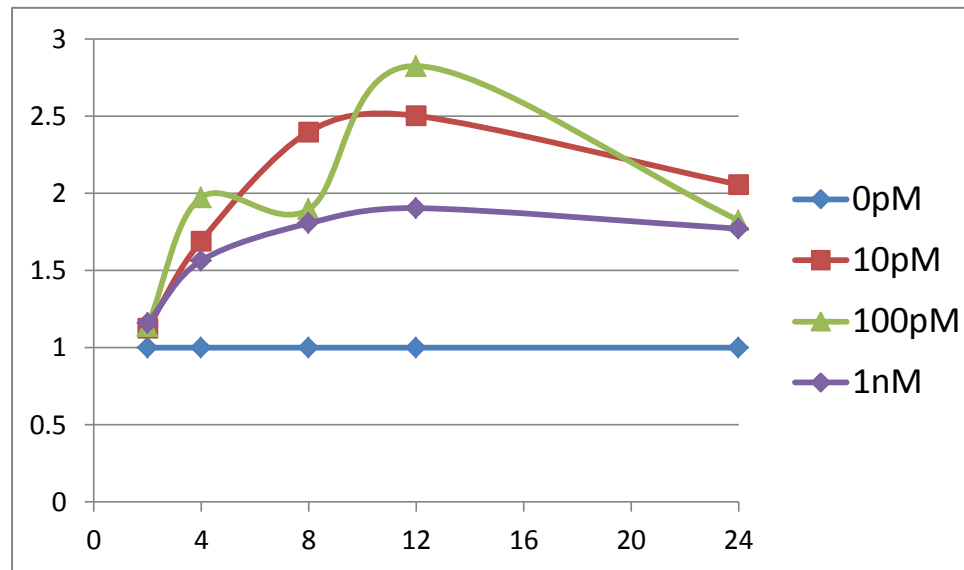

CXCL5 TREATMENT: 0pM, 10pM, or 100pM  
as indicated

x axis: treatment time (hr)  
y axis: 2ddCt (T-UT)

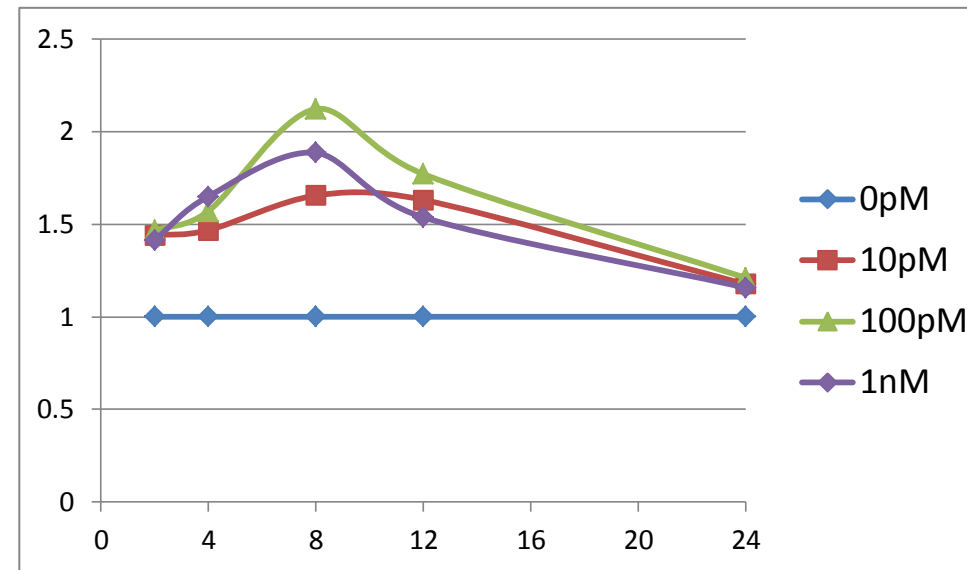

TGF-β1 TREATMENT: 0, 2, or 4 ng/ml as  
indicated

x axis: treatment time (hr)  
y axis: 2ddCt (T-UT)

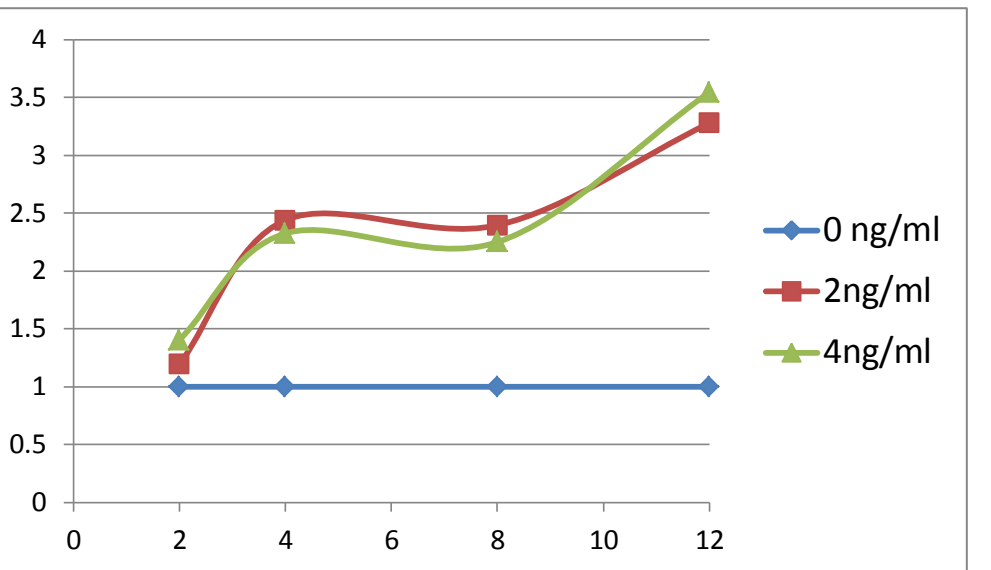

TGF-β1 Transcript

COL1 Transcript

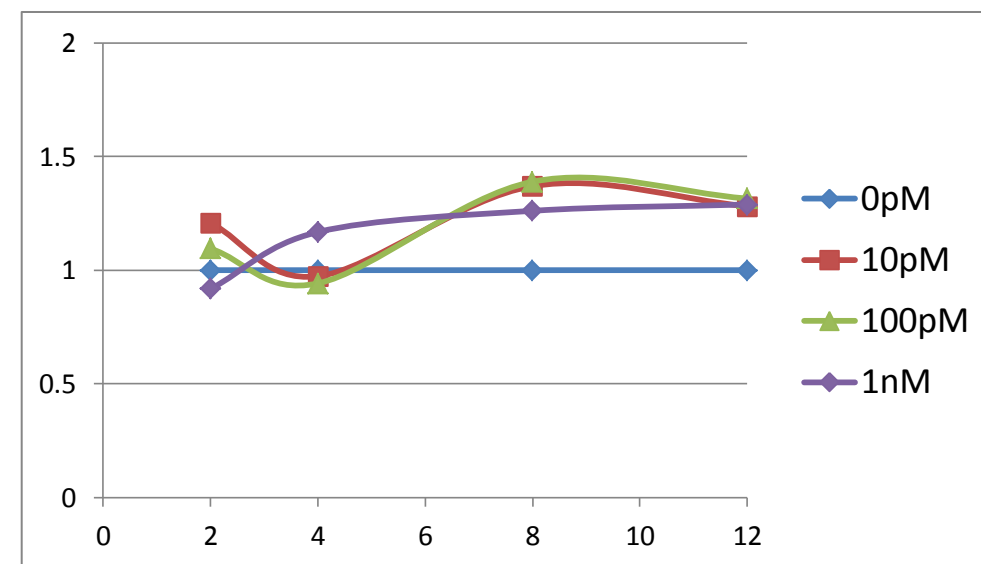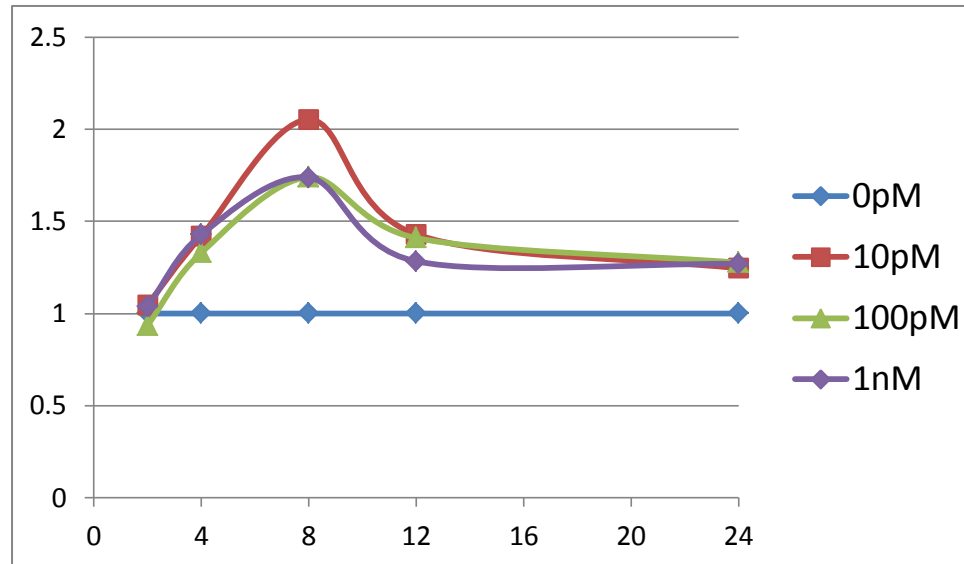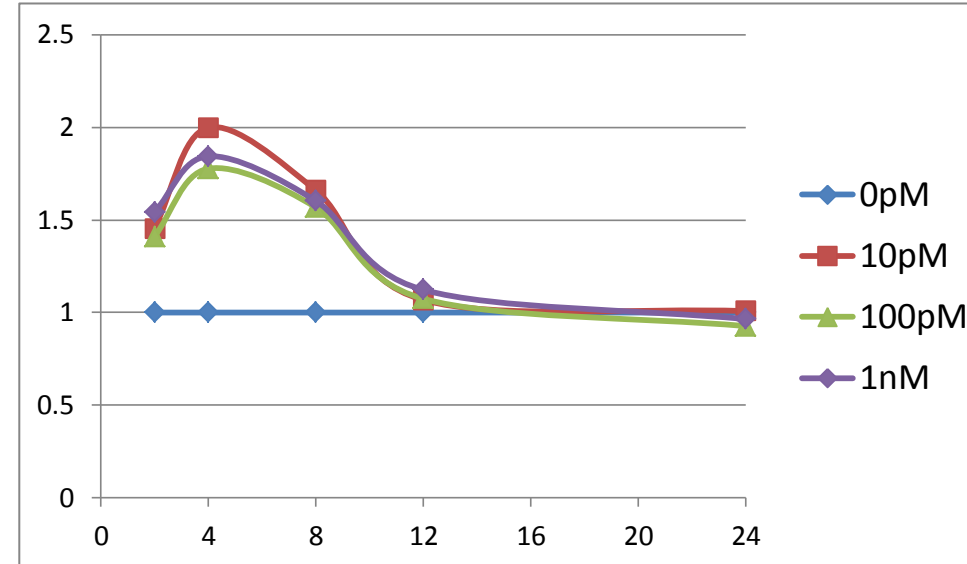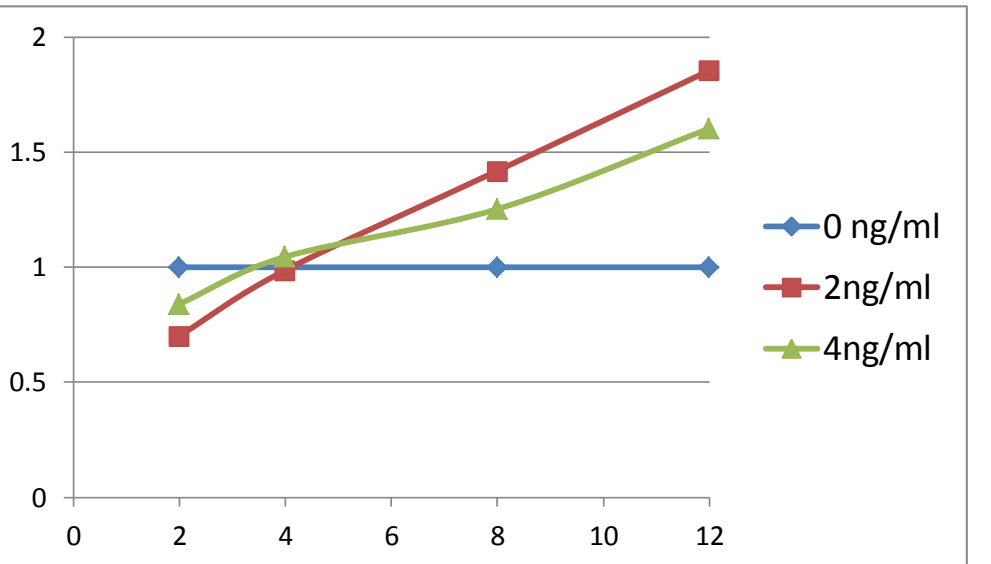

αSMA Transcript

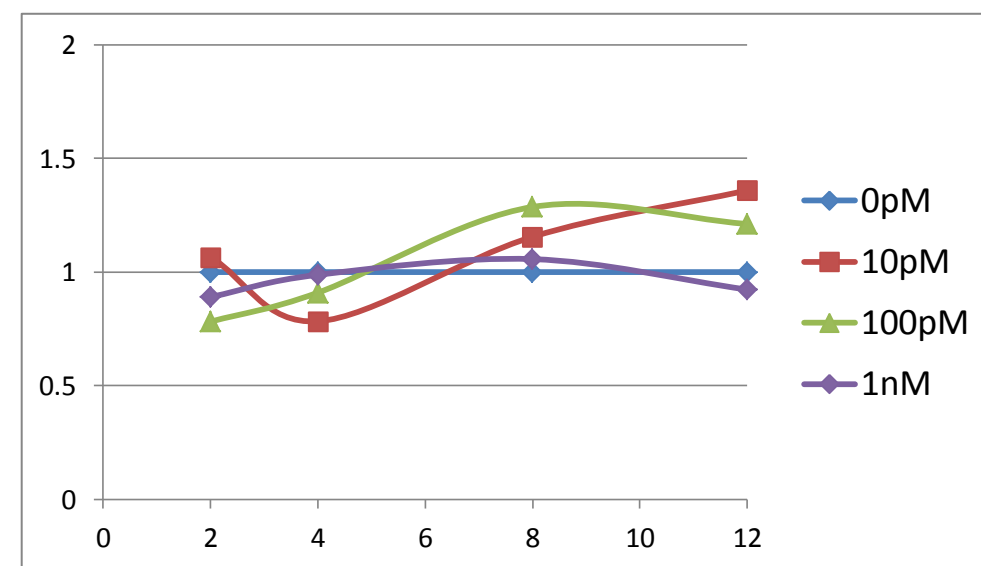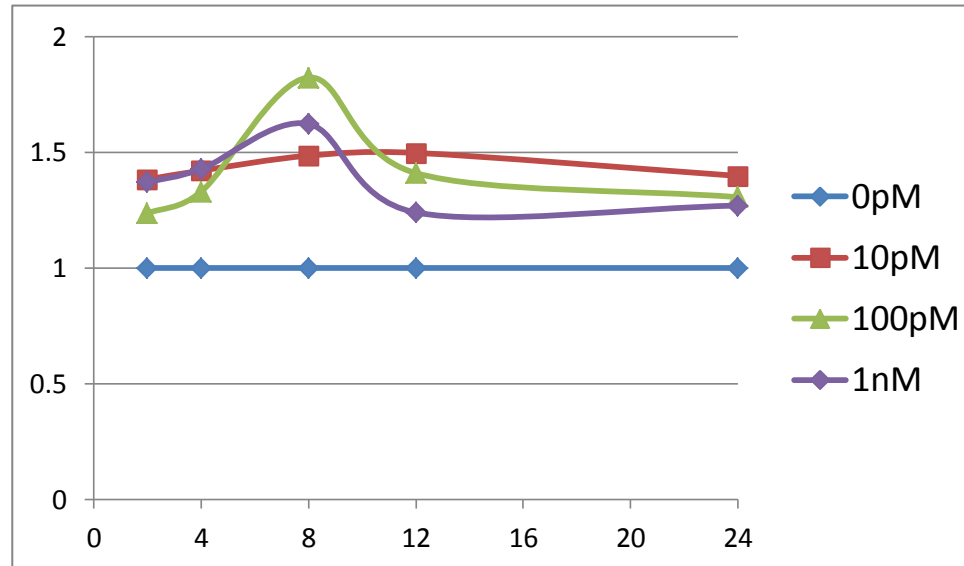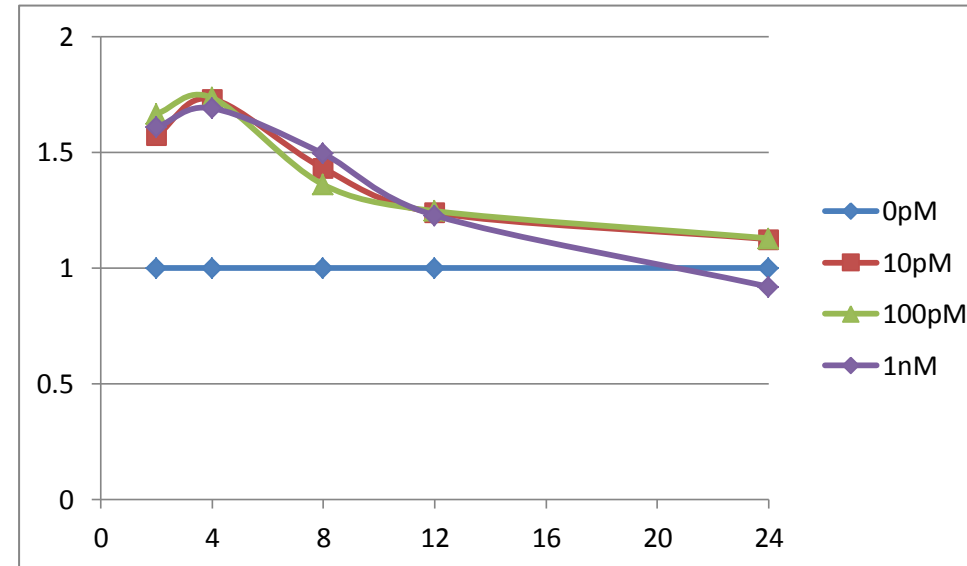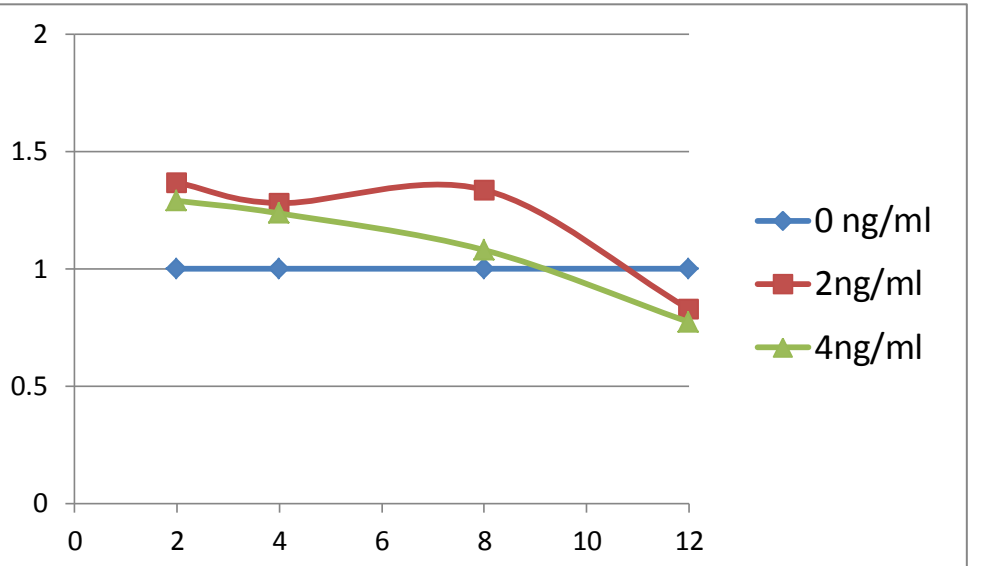

COL3 Transcript

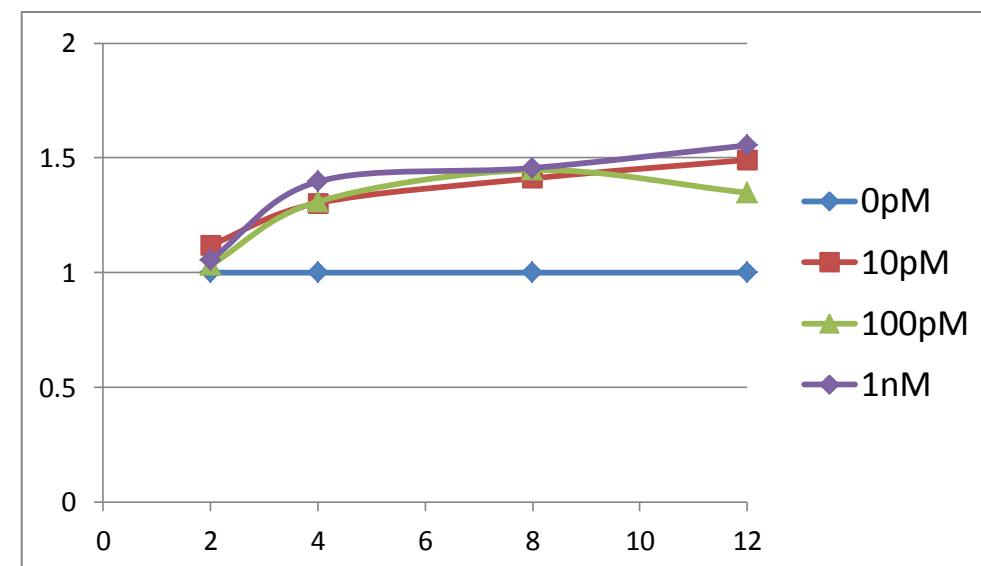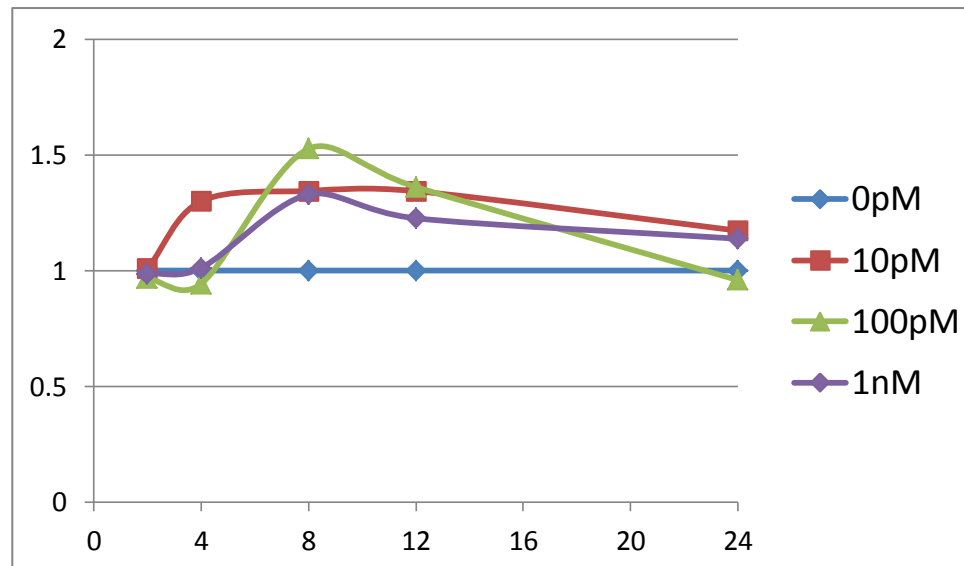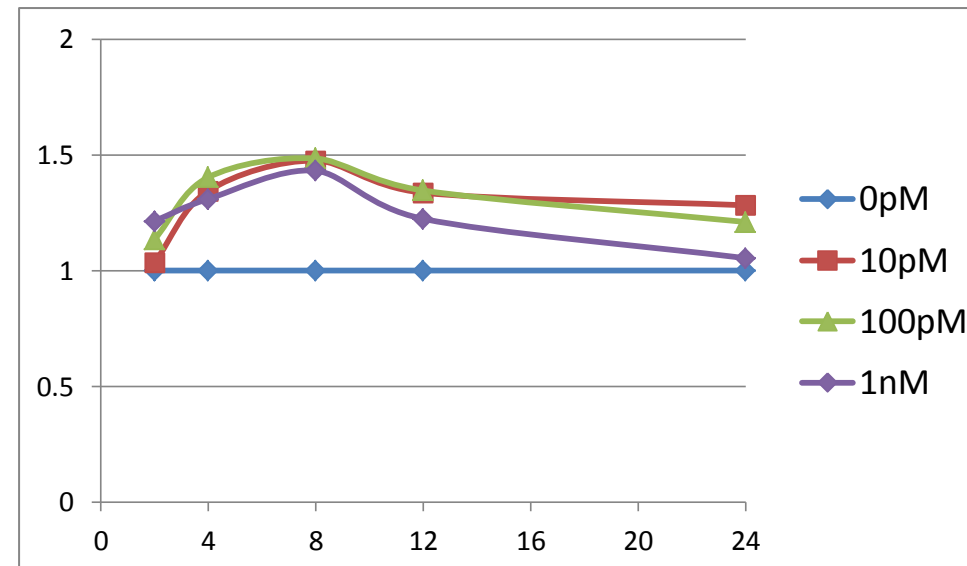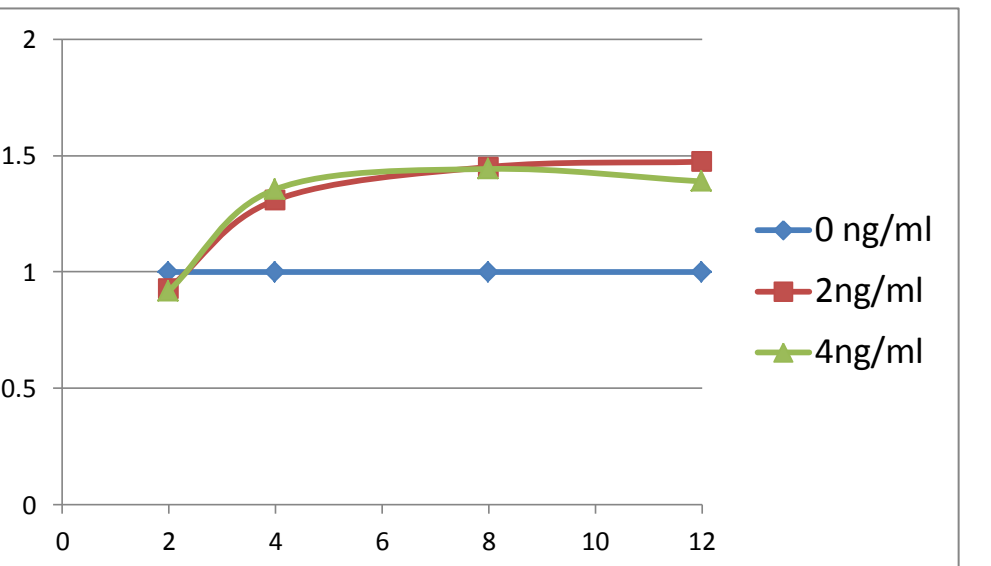

Supplement: S4 (10.1371/journal.pone.0049278.s004) [file journal.pone.0049278.s004]
